# Supplementary material for: A nutrient-wide association study for risk of prostate cancer in the European Prospective Investigation into Cancer and Nutrition and the Netherlands Cohort Study
Source: Springer Nature journal article supplement (doi:10.1007/s00394-019-02132-z), 2019-11-08

### Cakes & biscuits consumption

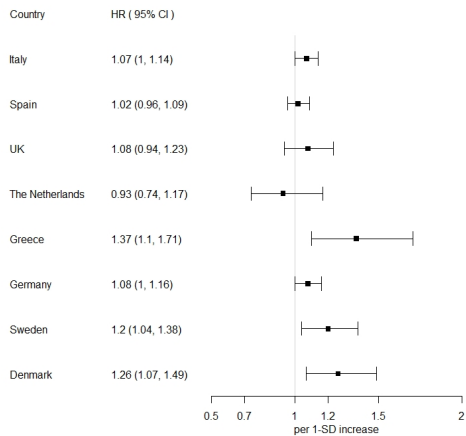

### Butter consumption

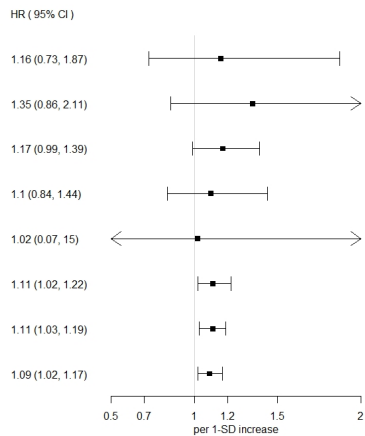

Supplement: MOESM1 [file 17366564]
